# Supplementary material for: Phenotypic evidence of deltamethrin resistance and identification of selective sweeps in Anopheles mosquitoes on the Bijagós Archipelago, Guinea-Bissau
Source: Springer Nature journal article supplement (doi:10.1038/s41598-024-73996-3), 2024-10-01
Supplement: MOESM1 [file 41598_2024_73996_MOESM1_ESM.xls]

## Sheet: Contents
Contents
CNV alleles	List of CNV alleles investigated using breakpoints defined in Lucas et al (2019)[1]
Ag1000G_phase3_verification_set	List of sample IDs and countries used to verify soft clipping method of identifying CNV alleles
Ag1000G_discordant_read_calls	Discordant read calls for verification sample IDs, accessed via the MalariaGEN Ag3 API client
Ag1000G_soft_clipping	Proportion of reads at the start or end of a CNV that have been soft-clipped (breakpoint positions taken from Lucas et al. 2019. supplementary information)
Bijagos_soft_clipping	Proportion of reads at the start or end of a CNV that have been soft-clipped (breakpoint positions taken from Lucas et al. 2019. supplementary information)
	The average proportion of reads soft clipped in confirmed CNV alleles within the verification set was 19.53
	Soft-clipping proportions above this threshold within the Bijagos sample set have been highlighted green to indicate possible presence of this CNV allele
References
[1] Lucas ER, Miles A, Harding NJ, Clarkson CS, Lawniczak MKN, Kwiatkowski DP, Weetman D, Donnelly MJ; Anopheles gambiae 1000 Genomes Consortium. Whole-genome sequencing reveals high complexity of copy number variation at insecticide resistance loci in malaria mosquitoes. Genome Res. 2019 Aug;29(8):1250-1261. doi: 10.1101/gr.245795.118. Epub 2019 Jul 25. PMID: 31345938; PMCID: PMC6673711.

## Sheet: CNV alleles
We analysed soft-clipped reads to detect the presence of CNV alleles previously identified by the Anopheles gambiae 1000 Genomes Consortium1. This included the following CNV alleles:
CNV Allele1
Cyp6aap_Dup1
Cyp6aap_Dup2
Cyp6aap_Dup3
Cyp6aap_Dup4
Cyp6aap_Dup5
Cyp6aap_Dup6
Cyp6aap_Dup7
Cyp6aap_Dup8
Cyp6aap_Dup9
Cyp6aap_Dup10
Cyp6aap_Dup11
Cyp6aap_Dup12
Cyp6aap_Dup13
Cyp6aap_Dup14
Cyp6m_Dup1
Cyp6z_Dup1
Cyp9k1_Dup1
Cyp9k1_Dup2
Cyp9k1_Dup3
Cyp9k1_Dup4
Cyp9k1_Dup5
Cyp9k1_Dup6
Cyp9k1_Dup7
Cyp9k1_Dup8
Cyp9k1_Dup9
Cyp9k1_Dup10
Cyp9k1_Dup11
Cyp9k1_Dup12
Cyp9k1_Dup13
Cyp9k1_Dup14
Cyp9k1_Dup15
Cyp9k1_Dup16
Gstue_Dup1
Gstue_Dup3
Gstue_Dup4
Gstue_Dup5
Gstue_Dup6
Gstue_Dup7
Gstue_Dup8
Gstue_Dup9

## Sheet: Ag1000G_phase3_verification_set
Bamfile	Sample ID	Country	Species	Sample Set
AG0004-C.sorted.filtered	AG0004-C	The Gambia	Anopheles gambiae complex	AG1000G-GM-C
AG0018-C.sorted.filtered	AG0018-C	The Gambia	Anopheles gambiae complex	AG1000G-GM-C
AG0019-C.sorted.filtered	AG0019-C	The Gambia	Anopheles gambiae complex	AG1000G-GM-C
AG0043-C.sorted.filtered	AG0043-C	The Gambia	Anopheles gambiae complex	AG1000G-GM-C
AG0049-C.sorted.filtered	AG0049-C	The Gambia	Anopheles gambiae complex	AG1000G-GM-C
AG0058-C.sorted.filtered	AG0058-C	The Gambia	Anopheles gambiae complex	AG1000G-GM-C
AG0060-C.sorted.filtered	AG0060-C	The Gambia	Anopheles gambiae complex	AG1000G-GM-C
AG0064-C.sorted.filtered	AG0064-C	The Gambia	Anopheles gambiae complex	AG1000G-GM-C
AG0074-C.sorted.filtered	AG0074-C	The Gambia	Anopheles gambiae complex	AG1000G-GM-C
AG0135-C.sorted.filtered	AG0135-C	The Gambia	Anopheles gambiae complex	AG1000G-GM-A
AG0225-C.sorted.filtered	AG0225-C	The Gambia	Anopheles gambiae complex	AG1000G-GM-A
AG0226-C.sorted.filtered	AG0226-C	The Gambia	Anopheles gambiae complex	AG1000G-GM-A
AG0234-C.sorted.filtered	AG0234-C	The Gambia	Anopheles gambiae complex	AG1000G-GM-A
AG0284-C.sorted.filtered	AG0284-C	The Gambia	Anopheles gambiae complex	AG1000G-GM-C
AG0291-C.sorted.filtered	AG0291-C	The Gambia	Anopheles gambiae complex	AG1000G-GM-C
AG0303-C.sorted.filtered	AG0303-C	The Gambia	Anopheles gambiae complex	AG1000G-GM-C
AG0318-C.sorted.filtered	AG0318-C	The Gambia	Anopheles gambiae complex	AG1000G-GM-C
AG0328-C.sorted.filtered	AG0328-C	The Gambia	Anopheles gambiae complex	AG1000G-GM-C
AG0340-C.sorted.filtered	AG0340-C	The Gambia	Anopheles gambiae complex	AG1000G-GM-C
AG0354-C.sorted.filtered	AG0354-C	The Gambia	Anopheles gambiae complex	AG1000G-GM-C
AJ0023-C.sorted.filtered	AJ0023-C	Guinea-Bissau	Anopheles gambiae complex	AG1000G-GW
AJ0037-C.sorted.filtered	AJ0037-C	Guinea-Bissau	Anopheles gambiae complex	AG1000G-GW
AJ0038-C.sorted.filtered	AJ0038-C	Guinea-Bissau	Anopheles gambiae complex	AG1000G-GW
AJ0039-C.sorted.filtered	AJ0039-C	Guinea-Bissau	Anopheles gambiae complex	AG1000G-GW
AJ0049-C.sorted.filtered	AJ0049-C	Guinea-Bissau	Anopheles gambiae complex	AG1000G-GW
AJ0056-C.sorted.filtered	AJ0056-C	Guinea-Bissau	Anopheles gambiae complex	AG1000G-GW
AJ0059-C.sorted.filtered	AJ0059-C	Guinea-Bissau	Anopheles gambiae complex	AG1000G-GW
AJ0061-C.sorted.filtered	AJ0061-C	Guinea-Bissau	Anopheles gambiae complex	AG1000G-GW
AJ0071-C.sorted.filtered	AJ0071-C	Guinea-Bissau	Anopheles gambiae complex	AG1000G-GW
AJ0072-C.sorted.filtered	AJ0072-C	Guinea-Bissau	Anopheles gambiae complex	AG1000G-GW
AJ0085-C.sorted.filtered	AJ0085-C	Guinea-Bissau	Anopheles gambiae complex	AG1000G-GW
AJ0097-C.sorted.filtered	AJ0097-C	Guinea-Bissau	Anopheles gambiae complex	AG1000G-GW
AJ0107-C.sorted.filtered	AJ0107-C	Guinea-Bissau	Anopheles gambiae complex	AG1000G-GW
AJ0113-C.sorted.filtered	AJ0113-C	Guinea-Bissau	Anopheles gambiae complex	AG1000G-GW
AJ0117-C.sorted.filtered	AJ0117-C	Guinea-Bissau	Anopheles gambiae complex	AG1000G-GW
AJ0120-C.sorted.filtered	AJ0120-C	Guinea-Bissau	Anopheles gambiae complex	AG1000G-GW
AJ0121-C.sorted.filtered	AJ0121-C	Guinea-Bissau	Anopheles gambiae complex	AG1000G-GW
AJ0122-C.sorted.filtered	AJ0122-C	Guinea-Bissau	Anopheles gambiae complex	AG1000G-GW
AJ0123-C.sorted.filtered	AJ0123-C	Guinea-Bissau	Anopheles gambiae complex	AG1000G-GW
AJ0124-C.sorted.filtered	AJ0124-C	Guinea-Bissau	Anopheles gambiae complex	AG1000G-GW
AJ0125-C.sorted.filtered	AJ0125-C	Guinea-Bissau	Anopheles gambiae complex	AG1000G-GW
AJ0126-C.sorted.filtered	AJ0126-C	Guinea-Bissau	Anopheles gambiae complex	AG1000G-GW
AJ0127-C.sorted.filtered	AJ0127-C	Guinea-Bissau	Anopheles gambiae complex	AG1000G-GW
AJ0131-C.sorted.filtered	AJ0131-C	Guinea-Bissau	Anopheles gambiae complex	AG1000G-GW
AJ0133-C.sorted.filtered	AJ0133-C	Guinea-Bissau	Anopheles gambiae complex	AG1000G-GW
AJ0138-C.sorted.filtered	AJ0138-C	Guinea-Bissau	Anopheles gambiae complex	AG1000G-GW
AJ0140-C.sorted.filtered	AJ0140-C	Guinea-Bissau	Anopheles gambiae complex	AG1000G-GW
AJ0145-C.sorted.filtered	AJ0145-C	Guinea-Bissau	Anopheles gambiae complex	AG1000G-GW
AJ0155-C.sorted.filtered	AJ0155-C	Guinea-Bissau	Anopheles gambiae complex	AG1000G-GW

## Sheet: Ag1000G_discordant_read_calls
Sample set for verification from Ag100G
Discordant read calls
Green cells indicate that a CNV allele was present in that sample accoridng to discordant read calls
AG1000G-GM-C
samples	AG0004-C	AG0018-C	AG0019-C	AG0043-C	AG0049-C	AG0058-C	AG0060-C	AG0064-C	AG0074-C	AG0284-C	AG0291-C	AG0303-C	AG0318-C	AG0328-C	AG0340-C	AG0354-C
variants
Cyp6aap_Dup7	0	0	1	0	0	0	0	0	0	1	1	0	1	0	0	1
Cyp6mz_Dupz1	0	0	0	0	0	1	0	0	0	0	0	0	0	0	0	0
AG1000G-GM-A
samples	AG0135-C	AG0225-C	AG0226-C	AG0234-C
variants
Cyp6aap_Dup7	1	0	0	0
AG1000G-GW
samples	AJ0023-C	AJ0037-C	AJ0038-C	AJ0039-C	AJ0049-C	AJ0056-C	AJ0059-C	AJ0061-C	AJ0071-C	AJ0072-C	AJ0085-C	AJ0097-C	AJ0107-C	AJ0113-C	AJ0117-C	AJ0120-C	AJ0121-C	AJ0122-C	AJ0123-C	AJ0124-C	AJ0125-C	AJ0126-C	AJ0127-C	AJ0131-C	AJ0133-C	AJ0138-C	AJ0140-C	AJ0145-C	AJ0155-C
variants
Cyp6aap_Dup8	0	0	0	0	0	0	0	0	0	0	0	0	0	0	0	0	0	0	0	0	0	1	0	0	0	0	0	0	0
Cyp9k1_Dup3	0	0	0	0	0	0	1	0	0	0	0	0	0	0	0	0	0	0	0	0	0	0	0	0	0	0	0	0	0
Cyp9k1_Dup11	0	0	0	0	0	0	0	0	0	0	0	0	0	0	0	1	0	0	0	0	1	1	0	0	0	0	0	0	0
Cyp9k1_Dup12	0	0	0	0	0	0	0	0	0	0	0	0	0	0	0	0	0	0	0	0	0	0	0	0	0	0	1	0	0

## Sheet: Ag1000G_soft_clipping
Sample	Cyp6aap_Dup1_Pos_Range_Start	Cyp6aap_Dup1_Pos_Range_End	Cyp6aap_Dup10_Pos_Range_Start	Cyp6aap_Dup10_Pos_Range_End	Cyp6aap_Dup11_Pos_Range_Start	Cyp6aap_Dup11_Pos_Range_End	Cyp6aap_Dup12_Pos_Range_Start	Cyp6aap_Dup12_Pos_Range_End	Cyp6aap_Dup13_Pos_Range_Start	Cyp6aap_Dup13_Pos_Range_End	Cyp6aap_Dup14_Pos_Range_Start	Cyp6aap_Dup14_Pos_Range_End	Cyp6aap_Dup15_Pos_Range_Start	Cyp6aap_Dup2_Pos_Range_Start	Cyp6aap_Dup2_Pos_Range_End	Cyp6aap_Dup3_Pos_Range_Start	Cyp6aap_Dup3_Pos_Range_End	Cyp6aap_Dup4_Pos_Range_Start	Cyp6aap_Dup4_Pos_Range_End	Cyp6aap_Dup5_Pos_Range_Start	Cyp6aap_Dup5_Pos_Range_End	Cyp6aap_Dup6_Pos_Range_Start	Cyp6aap_Dup6_Pos_Range_End	Cyp6aap_Dup7_Pos_Range_Start	Cyp6aap_Dup7_Pos_Range_End	Cyp6aap_Dup8_Pos_Range_Start	Cyp6aap_Dup8_Pos_Range_End	Cyp6aap_Dup9_Pos_Range_Start	Cyp6aap_Dup9_Pos_Range_End	Cyp6m_Dup1_Pos_Range_Start	Cyp6z_Dup1_Pos_Range_Start	Cyp6z_Dup1_Pos_Range_End	Cyp9k1_Dup1_Pos_Range_Start	Cyp9k1_Dup1_Pos_Range_End	Cyp9k1_Dup10_Pos_Range_Start	Cyp9k1_Dup10_Pos_Range_End	Cyp9k1_Dup11_Pos_Range_Start	Cyp9k1_Dup11_Pos_Range_End	Cyp9k1_Dup12_Pos_Range_Start	Cyp9k1_Dup12_Pos_Range_End	Cyp9k1_Dup13_Pos_Range_Start	Cyp9k1_Dup13_Pos_Range_End	Cyp9k1_Dup14_Pos_Range_End	Cyp9k1_Dup16_Pos_Range_Start	Cyp9k1_Dup16_Pos_Range_End	Cyp9k1_Dup2_Pos_Range_Start	Cyp9k1_Dup2_Pos_Range_End	Cyp9k1_Dup3_Pos_Range_Start	Cyp9k1_Dup3_Pos_Range_End
AG0004-C.sorted.filtered	2.32558	0	0	0	0	0	0	0	0	0	0	0	0	0	0	0	0	0	0	0	0	0	0	0	0	0	0	0	0	0	0	0	0	0	0	0	0	0	0	0	0	0	0	0	0	0	0	0	0
AG0018-C.sorted.filtered	0	0	0	0	2.63158	0	0	0	0	0	0	0	0	0	0	0	0	0	0	0	0	0	0	3.22581	0	0	0	0	0	0	0	0	0	0	0	0	0	0	0	0	0	0	0	0	0	0	0	0	0
AG0019-C.sorted.filtered	0	0	0	0	0	0	0	0	0	0	0	0	0	0	0	0	0	0	0	0	0	0	0	21.123	18.75	0	0	0	0	0	0	0	0	0	0	0	0	0	0	0	0	0	0	0	0	0	0	0	0
AG0043-C.sorted.filtered	0	0	0	0	0	0	0	0	0	0	0	0	0	0	0	0	0	0	0	0	0	0	0	0	0	0	0	0	0	0	0	0	0	0	0	0	0	0	0	0	0	0	0	0	0	0	0	0	0
AG0049-C.sorted.filtered	0	0	0	0	0	0	0	0	0	0	0	0	0	0	0	0	0	0	0	0	0	0	0	0	0	0	0	0	0	0	0	0	0	0	0	0	0	0	0	0	0	0	0	0	0	0	0	0	0
AG0058-C.sorted.filtered	0	0	0	0	0	0	0	0	0	0	0	0	0	0	0	0	0	0	0	0	0	0	0	0	0	0	0	0	0	55.5556	13.3333	17.7778	0	0	0	0	0	0	0	0	0	0	0	0	0	0	0	0	0
AG0060-C.sorted.filtered	0	0	0	0	0	0	0	0	0	0	0	0	0	0	0	0	0	0	0	0	0	0	0	0	0	0	0	0	0	0	0	0	0	0	0	0	0	0	0	0	0	0	0	0	0	0	0	0	0
AG0064-C.sorted.filtered	0	0	0	0	0	0	0	0	0	0	0	0	0	0	0	0	0	0	0	0	0	0	0	0	0	0	0	0	0	0	0	0	0	0	0	0	0	0	0	0	0	0	0	0	0	0	0	0	0
AG0074-C.sorted.filtered	0	0	0	0	0	0	0	0	0	0	0	0	0	0	0	0	0	0	0	0	0	0	0	0	0	0	0	0	0	0	0	0	0	0	0	0	0	0	0	0	0	0	0	0	0	0	0	0	0
AG0135-C.sorted.filtered	0	0	0	0	0	0	0	0	0	0	0	0	0	0	0	0	0	0	0	0	0	0	0	29.7872	35.7143	0	0	0	0	0	0	0	0	0	2.08333	0	0	0	0	0	0	0	0	0	0	0	0	0	0
AG0225-C.sorted.filtered	0	0	0	0	0	0	0	0	0	0	0	0	0	0	0	0	0	0	0	0	0	0	0	0	0	0	0	0	0	0	0	0	0	0	0	0	0	0	0	0	0	0	0	0	0	0	0	0	0
AG0226-C.sorted.filtered	0	0	0	0	0	0	0	0	0	0	0	0	0	0	0	0	0	2.43902	0	0	0	0	0	2.63158	0	0	0	0	0	0	0	0	0	0	0	0	0	0	0	3.84615	0	0	0	0	0	0	0	0	0
AG0234-C.sorted.filtered	0	0	0	0	0	0	0	0	0	0	0	0	0	0	0	0	0	0	0	0	0	0	0	0	0	0	0	0	0	0	0	0	0	0	0	0	0	0	0	0	0	0	0	0	0	0	0	0	0
AG0284-C.sorted.filtered	0	0	0	0	0	2.43902	0	0	0	0	0	0	0	0	0	0	0	0	0	0	0	0	0	17.1429	21.0526	0	0	0	0	2.43902	0	0	0	0	0	0	0	0	0	0	0	0	0	0	0	0	0	0	0
AG0291-C.sorted.filtered	0	0	0	0	0	0	0	0	0	0	0	0	0	0	0	0	0	0	0	0	0	0	0	25.6705	24.8256	0	0	0	0	0	0	3.125	0	0	0	0	0	0	0	0	0	0	0	0	0	0	0	0	0
AG0303-C.sorted.filtered	0	0	0	0	0	0	0	0	0	0	0	0	0	0	0	0	0	0	0	0	0	0	0	0	0	0	0	0	0	0	0	0	0	0	0	0	0	0	0	0	0	0	0	0	0	0	0	0	0
AG0318-C.sorted.filtered	0	0	0	0	0	0	0	3.125	0	0	0	0	0	0	0	0	0	0	0	0	0	0	0	8.82353	14.5207	0	0	0	0	0	0	2.7027	0	0	0	0	0	0	0	0	0	0	0	0	0	0	0	0	0
AG0328-C.sorted.filtered	0	0	0	0	0	0	0	0	0	0	0	0	0	0	0	0	0	0	0	0	0	0	0	0	0	0	0	0	0	0	0	0	0	0	0	0	0	0	0	0	0	0	0	0	0	0	0	0	0
AG0340-C.sorted.filtered	0	0	0	0	0	0	0	0	0	0	0	0	0	0	0	0	0	0	0	0	0	0	0	0	0	0	0	0	0	0	0	0	0	0	0	0	0	0	0	0	0	0	0	0	0	0	0	0	0
AG0354-C.sorted.filtered	0	0	0	0	0	0	0	0	0	0	0	0	0	0	0	0	0	0	0	0	0	0	0	21.0526	16.2791	0	0	0	0	0	0	0	0	0	0	0	0	0	0	0	0	0	0	0	0	0	0	0	0
AJ0023-C.sorted.filtered	0	0	0	0	0	0	0	0	0	0	0	0	0	0	0	0	0	0	0	0	0	0	0	3.57143	0	0	0	0	0	0	0	0	0	0	0	0	0	3.44828	0	0	0	0	0	0	2.63158	0	0	0	0
AJ0037-C.sorted.filtered	0	0	0	0	0	0	0	0	0	0	0	0	0	0	0	0	0	0	0	0	0	0	0	0	0	0	0	0	0	0	0	0	0	0	0	0	0	0	0	0	0	0	0	0	0	0	0	0	0
AJ0038-C.sorted.filtered	0	0	0	0	0	0	0	0	0	0	0	0	0	0	0	0	0	0	0	0	0	0	0	0	0	0	0	0	0	0	0	0	0	0	0	0	0	0	0	0	0	0	0	0	0	0	0	0	0
AJ0039-C.sorted.filtered	0	0	0	3.57143	0	0	0	0	0	0	0	0	0	0	0	0	0	0	0	0	0	0	0	0	0	0	0	0	0	0	0	0	0	0	0	0	0	0	0	0	0	0	0	0	0	0	0	0	0
AJ0049-C.sorted.filtered	0	0	6.89655	0	0	0	0	0	0	0	0	0	0	0	0	0	0	0	0	0	0	4.16667	0	0	0	0	0	0	0	0	0	0	0	0	0	0	0	0	0	0	0	0	0	0	0	0	0	0	0
AJ0056-C.sorted.filtered	0	0	0	0	0	0	0	0	0	0	0	0	0	0	0	0	0	0	0	0	0	0	0	0	0	0	0	0	0	0	0	0	0	0	0	0	0	0	0	0	0	0	0	0	0	0	0	0	0
AJ0059-C.sorted.filtered	0	0	0	0	0	0	0	0	0	0	2.43902	0	0	0	0	0	0	0	0	0	0	0	0	0	0	0	0	0	0	0	0	0	0	0	0	0	0	0	0	0	0	0	0	0	0	0	0	25.5814	18
AJ0061-C.sorted.filtered	0	0	4	0	0	0	0	0	0	0	3.33333	0	0	0	0	0	0	0	0	0	0	0	0	3.7037	0	0	0	0	0	0	0	0	0	0	0	0	0	0	0	0	0	0	0	0	0	0	0	0	0
AJ0071-C.sorted.filtered	0	0	0	0	0	0	0	0	0	0	0	0	0	0	0	0	0	0	0	0	0	0	0	0	0	0	0	0	0	0	0	0	0	0	0	0	0	0	0	0	0	0	0	0	0	0	0	0	0
AJ0072-C.sorted.filtered	0	0	0	0	0	0	0	0	0	0	0	0	0	0	0	0	0	0	0	0	0	0	0	0	0	0	0	0	0	0	0	0	0	0	0	0	0	0	0	0	0	0	0	0	0	0	0	0	0
AJ0080-C.sorted.filtered	0	0	0	0	0	5.26316	0	0	0	0	0	0	0	0	0	0	0	0	0	0	0	0	0	0	0	0	0	0	0	0	0	0	0	0	0	0	0	0	0	0	0	0	0	0	0	0	0	0	0
AJ0085-C.sorted.filtered	0	0	0.925926	0	0	0	0	0	0	0	0	0	0	0	0	0	0	0	0	0	0	0	0	0	0	0	0	0	0	0	0.806452	0	0	0	0	0	0	0	0	0	0	0	0	0	0	0	0	0	0
AJ0097-C.sorted.filtered	0	0	0	0	0	0	0	0	0	0	0	0	0	0	0	0	0	0	0	0	0	0	0	3.33333	0	0	0	0	0	0	0	0	0	0	0	0	0	0	0	0	0	0	0	0	0	0	0	0	0
AJ0107-C.sorted.filtered	0	0	0	0	0	0	0	0	0	0	0	0	0	0	0	0	0	0	0	0	0	0	0	0	0	0	0	0	0	0	0	0	0	0	0	0	0	0	0	0	0	0	0	0	0	0	0	0	0
AJ0113-C.sorted.filtered	0	0	0	0	0	0	0	0	0	0	0	0	0	0	0	0	0	0	0	0	0	0	0	0	0	0	0	0	0	0	0	0	0	0	0	0	2.38095	0	0	0	0	0	0	0	0	0	0	0	0
AJ0117-C.sorted.filtered	0	0	5.40541	0	0	0	0	0	0	0	0	0	0	0	0	0	0	0	0	0	0	0	0	0	0	0	0	0	0	0	0	0	0	0	0	0	0	0	0	0	0	0	0	0	0	0	0	0	0
AJ0120-C.sorted.filtered	0	0	0	0	0	0	0	0	0	0	0	0	0	0	0	0	0	0	0	0	0	0	3.0303	0	0	0	0	0	0	0	0	0	0	0	0	0	0	25	0	0	0	0	0	0	0	0	0	0	0
AJ0121-C.sorted.filtered	0	0	0	0	0	0	0	0	0	0	0	0	0	0	0	0	0	0	0	0	0	0	0	0	0	0	0	0	0	0	0	0	0	0	0	0	0	0	0	0	0	0	0	0	0	0	0	0	0
AJ0122-C.sorted.filtered	0	0	0	0	0	0	0	0	0	0	0	0	0	0	0	0	0	0	0	0	0	0	0	0	0	0	0	0	0	0	0	0	0	0	0	0	0	0	0	0	0	0	0	0	0	0	0	0	0
AJ0123-C.sorted.filtered	0	0	0	0	0	2.77778	0	0	0	0	0	0	0	0	0	0	0	0	0	0	3.125	0	0	0	0	0	0	0	0	0	0	0	0	0	0	0	0	0	0	0	0	0	0	0	0	0	0	0	0
AJ0124-C.sorted.filtered	0	0	0	0	0	0	0	0	0	0	0	0	0	0	0	0	0	0	0	0	0	0	0	0	0	0	0	0	0	0	0	0	0	0	0	0	0	0	0	0	0	0	0	0	0	0	0	0	0
AJ0125-C.sorted.filtered	0	0	0	0	0	0	0	0	0	0	0	0	0	0	0	0	0	0	0	0	0	0	0	0	0	0	0	0	0	0	0	0	0	0	0	0	0	36.3636	0	0	0	0	0	0	0	0	0	0	0
AJ0126-C.sorted.filtered	0	0	0	0	0	0	0	0	0	0	0	0	0	0	0	0	0	0	0	0	2.38095	0	0	3.33333	0	21.4286	16.2791	0	0	0	0	0	0	0	0	0	0	28	0	0	0	0	0	0	0	0	0	0	0
AJ0127-C.sorted.filtered	0	0	0	0	0	0	0	0	0	0	0	0	0	0	0	0	0	0	0	0	0	0	0	0	2.7027	0	0	0	0	0	0	0	0	0	0	0	0	0	0	0	0	0	0	0	0	0	0	0	0
AJ0131-C.sorted.filtered	0	0	0	0	0	0	0	0	0	0	0	0	0	0	0	0	0	0	0	0	0	0	0	0	0	0	0	0	0	0	0	0	0	0	0	0	0	0	0	0	0	0	0	0	0	0	0	0	0
AJ0133-C.sorted.filtered	0	0	6.45161	0	0	0	0	0	0	0	0	0	0	0	0	0	0	0	0	0	0	0	0	0	0	0	0	0	0	6.66667	0	0	0	0	0	0	0	0	0	0	0	0	0	0	0	0	0	0	0
AJ0138-C.sorted.filtered	0	0	0	2.5	0	0	0	0	0	0	0	0	0	0	0	0	0	0	0	0	0	0	0	0	0	0	0	0	0	0	0	0	0	0	0	0	0	0	0	0	0	0	0	0	0	0	0	0	0
AJ0140-C.sorted.filtered	2.38095	0	0	0	5.26316	0	0	0	0	0	0	0	0	0	0	0	0	0	0	0	0	0	0	0	0	0	0	0	0	0	0	0	0	0	0	0	0	0	17.0732	17.6471	0	0	0	0	0	0	0	0	0
AJ0145-C.sorted.filtered	0	0	0	0	0	0	0	0	0	0	0	0	0	0	0	0	0	0	0	0	0	0	0	3.33333	0	0	0	0	0	0	0	0	0	0	0	0	0	0	0	0	0	0	0	0	0	0	0	0	0
AJ0155-C.sorted.filtered	0	0	0	0	0	0	0	0	0	0	0	0	0	0	0	0	0	0	0	0	0	0	0	0	0	0	0	0	0	0	0	0	0	0	0	0	0	0	0	0	0	0	0	0	0	0	0	0	0
[truncated: 32 more columns]

## Sheet: Bijagos_soft_clipping
Sample	Cyp6aap_Dup1_Pos_Range_Start	Cyp6aap_Dup1_Pos_Range_End	Cyp6aap_Dup10_Pos_Range_Start	Cyp6aap_Dup10_Pos_Range_End	Cyp6aap_Dup11_Pos_Range_Start	Cyp6aap_Dup11_Pos_Range_End	Cyp6aap_Dup12_Pos_Range_Start	Cyp6aap_Dup12_Pos_Range_End	Cyp6aap_Dup13_Pos_Range_Start	Cyp6aap_Dup13_Pos_Range_End	Cyp6aap_Dup14_Pos_Range_Start	Cyp6aap_Dup14_Pos_Range_End	Cyp6aap_Dup15_Pos_Range_Start	Cyp6aap_Dup2_Pos_Range_Start	Cyp6aap_Dup2_Pos_Range_End	Cyp6aap_Dup3_Pos_Range_Start	Cyp6aap_Dup3_Pos_Range_End	Cyp6aap_Dup4_Pos_Range_Start	Cyp6aap_Dup4_Pos_Range_End	Cyp6aap_Dup5_Pos_Range_Start	Cyp6aap_Dup5_Pos_Range_End	Cyp6aap_Dup6_Pos_Range_Start	Cyp6aap_Dup6_Pos_Range_End	Cyp6aap_Dup7_Pos_Range_Start	Cyp6aap_Dup7_Pos_Range_End	Cyp6aap_Dup8_Pos_Range_Start	Cyp6aap_Dup8_Pos_Range_End	Cyp6aap_Dup9_Pos_Range_Start	Cyp6aap_Dup9_Pos_Range_End	Cyp6m_Dup1_Pos_Range_Start	Cyp6m_Dup1_Pos_Range_End	Cyp6z_Dup1_Pos_Range_Start	Cyp6z_Dup1_Pos_Range_End	Cyp9k1_Dup1_Pos_Range_Start	Cyp9k1_Dup1_Pos_Range_End	Cyp9k1_Dup10_Pos_Range_Start	Cyp9k1_Dup10_Pos_Range_End	Cyp9k1_Dup11_Pos_Range_Start	Cyp9k1_Dup11_Pos_Range_End	Cyp9k1_Dup12_Pos_Range_Start	Cyp9k1_Dup12_Pos_Range_End	Cyp9k1_Dup13_Pos_Range_Start	Cyp9k1_Dup13_Pos_Range_End	Cyp9k1_Dup14_Pos_Range_End	Cyp9k1_Dup15_Pos_Range_End	Cyp9k1_Dup16_Pos_Range_Start	Cyp9k1_Dup16_Pos_Range_End	Cyp9k1_Dup2_Pos_Range_Start	Cyp9k1_Dup2_Pos_Range_End
NG-33833_c12_lib708275_10265_1.mkdup.sorted.filtered	0	2.77778	0	0	0	0	0	0	0	0	0	0	0	0	0	0	0	0	0	0	0	0	0	0	0	0	0	0	0	0	0	0	0	0	0	0	0	0	0	0	0	0	0	0	0	0	0	0	0
NG-33833_c14_lib708276_10265_1.mkdup.sorted.filtered	0	0	0	0	0	2.5	0	0	0	0	0	0	0	0	0	0	0	0	0	0	0	0	0	3.57143	0	0	0	0	0	0	0	0	0	0	0	0	0	0	0	0	0	0	0	0	0	0	0	0	0
NG-33833_c16_lib708277_10265_1.mkdup.sorted.filtered	0	0	0	0	0	2.22222	0	0	0	0	0	0	0	0	0	0	0	0	0	0	0	0	0	0	0	0	0	0	0	0	0	0	0	0	0	0	0	0	0	0	0	0	0	0	0	0	0	0	0
NG-33833_c17_lib708278_10265_1.mkdup.sorted.filtered	0	0	0	0	0	0	0	0	0	0	0	0	0	0	0	0	0	0	0	0	0	3.57143	0	0	0	0	0	0	0	0	0	0	0	0	0	0	0	0	0	0	0	0	3.7037	0	0	0	0	0	0
NG-33833_c2_lib708270_10265_1.mkdup.sorted.filtered	0	0	0	0	5.88235	0	0	0	0	0	0	0	2	0	0	0	0	0	0	0	0	0	0	0	0	0	0	0	0	0	0	0	0	0	0	0	0	0	0	0	0	0	0	0	0	0	0	0	0
NG-33833_c4_lib708271_10265_1.mkdup.sorted.filtered	0	0	0	0	0	0	0	0	0	0	0	0	0	0	0	0	0	0	0	0	0	0	0	0	0	0	0	0	0	0	0	0	0	0	0	0	5.88235	0	0	0	0	0	0	0	0	0	0	0	0
NG-33833_c5_lib708272_10265_1.mkdup.sorted.filtered	0	0	0	0	0	0	0	0	0	0	0	0	0	0	0	0	0	0	0	0	0	0	0	0	0	0	0	0	0	0	0	0	0	0	0	0	0	0	0	0	0	0	0	0	0	0	0	0	0
NG-33833_c7_lib708273_10265_1.mkdup.sorted.filtered	0	0	0	0	0	0	0	0	0	0	0	0	0	0	0	0	0	0	0	0	0	0	0	0	0	0	0	0	0	0	0	0	0	0	0	0	0	0	0	0	0	0	0	0	0	0	0	0	0
NG-33833_c9_lib708274_10265_1.mkdup.sorted.filtered	0	0	2.94118	0	0	0	0	0	0	0	0	0	0	0	0	0	0	0	0	0	0	0	0	0	0	0	0	0	0	0	0	0	0	0	0	0	0	0	0	0	0	0	0	0	0	0	0	0	0
NG-33833_res10_lib708250_10265_1.mkdup.sorted.filtered	0	0	0	0	0	0	0	0	0	0	0	0	0	0	0	0	0	0	0	0	0	0	0	0	0	0	0	0	0	0	0	0	0	0	0	0	0	0	0	0	0	0	0	0	0	0	0	0	0
NG-33833_res11_lib708251_10265_1.mkdup.sorted.filtered	0	0	0	0	0	0	0	1.96078	0	0	0	0	0	0	0	0	0	0	0	0	0	0	0	0	0	0	0	0	0	0	0	0	0	0	0	0	0	0	0	0	0	0	0	0	0	0	0	0	0
NG-33833_res12_lib708252_10265_1.mkdup.sorted.filtered	0	0	0	0	0	0	0	0	0	7.14286	0	0	0	0	0	0	0	0	0	0	0	0	0	0	0	0	0	0	0	0	0	0	0	0	0	0	0	0	0	0	0	0	0	0	0	0	0	0	0
NG-33833_res15_lib708253_10265_1.mkdup.sorted.filtered	0	0	0	0	0	0	0	0	0	0	0	6.25	0	0	0	0	0	0	0	0	0	0	0	0	0	0	0	0	0	0	0	0	0	0	0	0	0	0	0	0	0	0	0	0	0	0	0	0	0
NG-33833_res16_lib708254_10265_1.mkdup.sorted.filtered	0	0	0	0	0	0	0	0	0	0	0	0	0	0	0	0	0	0	0	0	0	0	0	0	0	0	0	0	0	0	0	0	0	0	0	0	0	0	0	0	0	0	0	0	0	0	0	0	0
NG-33833_res17_lib708255_10265_1.mkdup.sorted.filtered	0	0	0	0	0	0	0	0	0	0	0	0	0	0	0	0	0	0	0	0	0	0	0	0	0	0	0	0	0	0	0	0	0	0	0	0	0	0	0	0	0	0	0	0	0	0	0	0	0
NG-33833_res24_lib708256_10265_1.mkdup.sorted.filtered	0	0	6.66667	0	0	2.5641	0	0	0	0	0	0	0	0	0	0	0	0	0	0	0	0	0	0	0	0	0	0	0	0	0	0	0	0	0	0	0	0	0	0	0	0	0	0	0	0	0	0	0
NG-33833_res29_lib708257_10265_1.mkdup.sorted.filtered	0	0	0	0	0	0	0	5.26316	0	0	0	14.2857	0	0	0	0	0	0	0	0	0	0	0	0	0	0	0	0	0	0	0	0	0	0	0	0	0	0	0	0	0	0	0	0	0	0	0	0	0
NG-33833_res35_lib708258_10265_1.mkdup.sorted.filtered	0	0	0	0	0	0	0	0	0	0	0	18.1818	0	0	0	0	0	0	0	0	0	0	0	0	0	0	0	0	0	0	0	0	0	0	0	0	0	0	0	0	0	0	0	0	0	0	0	0	0
NG-33833_res36_lib708259_10265_1.mkdup.sorted.filtered	0	0	0	0	0	0	0	0	0	0	0	0	0	0	0	0	0	0	14.2857	0	0	0	0	0	0	0	0	0	0	0	0	0	0	0	5.26316	0	0	0	0	0	0	0	0	0	0	0	0	0	0
NG-33833_res3_lib708245_10265_1.mkdup.sorted.filtered	0	0	10	0	0	1.85185	0	0	0	0	0	0	0	0	0	0	0	0	0	0	0	0	0	0	0	0	0	0	0	0	0	0	0	0	0	0	0	0	0	0	0	5.88235	0	0	0	0	0	0	0
NG-33833_res45_lib708261_10265_1.mkdup.sorted.filtered	0	0	0	0	0	0	0	0	0	0	0	3.7037	0	0	0	0	0	0	0	0	0	0	0	0	0	0	0	0	0	0	0	0	0	0	0	0	0	0	0	0	6.66667	0	4.54545	0	0	0	0	0	0
NG-33833_res46_lib708262_10265_1.mkdup.sorted.filtered	0	0	0	0	0	0	0	0	0	0	0	2.5	0	0	0	0	0	0	0	0	0	0	0	0	0	2	0	0	0	0	0	0	0	0	0	0	0	0	0	0	0	0	0	0	0	0	0	0	0
NG-33833_res49_lib708263_10265_1.mkdup.sorted.filtered	0	0	0	0	15.3846	1.2987	0	0	0	0	0	0	0	0	0	0	0	0	0	0	0	0	0	0	0	0	0	0	0	0	0	0	0	0	0	0	0	0	0	0	0	0	0	0	0	0	0	0	0
NG-33833_res50_lib708264_10265_1.mkdup.sorted.filtered	0	0	0	0	0	2.3953	0	0	0	0	2.77778	0	0	0	0	0	0	0	0	0	0	0	0	0	14.2857	0	0	2.32558	0	0	0	0	0	0	0	0	0	0	0	0	0	0	0	0	0	0	0	0	0
NG-33833_res52_lib708265_10265_1.mkdup.sorted.filtered	0	0	0	0	0	1.17647	0	0	0	0	0	0	0	0	0	0	0	0	0	0	0	0	0	0	0	0	0	0	0	0	0	0	0	0	0	0	0	0	0	0	0	0	0	0	0	0	0	0	0
NG-33833_res54_lib708266_10265_1.mkdup.sorted.filtered	0	0	0	0	0	5.88235	0	0	0	0	0	0	0	0	0	0	0	0	0	0	0	0	10	0	0	0	0	0	0	0	0	0	0	0	0	0	0	0	0	0	0	0	0	0	0	0	0	0	0
NG-33833_res55_lib708267_10265_1.mkdup.sorted.filtered	0	0	0	0	3.125	0.970874	0	0	0	6.25	0	0	0	0	0	0	1.13636	0	0	0	0	1.03093	0	0	0	0	0	0	0	0	0	0	0	0	0	0	0	0	0	0	5.88235	0	0	0	0	0	5	0	0
NG-33833_res56_lib708268_10265_1.mkdup.sorted.filtered	0	0	0	0	0	1.51515	0	0	0	0	4.7619	0	0	0	0	0	0	0	0	0	0	0	0	0	0	0	0	0	0	0	0	0	0	0	0	0	0	0	0	0	0	0	0	0	0	0	0	0	0
NG-33833_res57_lib708269_10265_1.mkdup.sorted.filtered	0	0	0	0	0	0	0	0	0	0	0	0	0	0	0	0	0	0	0	0	0	0	0	0	0	0	0	0	0	0	0	0	0	0	0	0	0	0	0	0	0	0	0	0	0	0	0	0	0
NG-33833_res6_lib708247_10265_1.mkdup.sorted.filtered	0	0	0	0	0	0	0	0	0	7.14286	0	0	0	0	0	0	0	0	0	0	0	0	0	0	0	0	0	0	0	0	0	0	0	0	0	0	0	0	0	0	0	0	0	0	0	0	0	0	0
NG-33833_res8_lib708248_10265_1.mkdup.sorted.filtered	0	0	0	0	0	0	0	0	0	0	0	0	0	0	0	0	0	0	0	0	0	0	0	0	0	5	0	0	0	0	0	0	0	0	0	0	0	0	0	0	0	0	0	0	0	0	0	0	0
NG-33833_res9_lib708249_10265_1.mkdup.sorted.filtered	5.88235	0	0	0	0	0	0	0	0	0	0	0	0	0	0	0	0	0	0	0	0	0	0	0	20	0	0	0	0	0	0	0	0	0	0	0	0	0	0	0	0	0	0	0	0	0	0	0	0
NG-33833_sus18_lib708285_10265_1.mkdup.sorted.filtered	0	0	0	0	0	0	0	0	4	0	0	0	0	0	0	0	0	0	0	0	0	0	0	0	0	0	0	0	0	0	0	0	0	0	0	0	0	0	0	0	0	0	0	0	0	0	0	0	0
NG-33833_sus25_lib708286_10265_1.mkdup.sorted.filtered	0	0	0	0	0	0	0	0	0	0	0	0	0	0	0	0	0	0	0	0	0	0	0	0	0	0	0	0	0	0	0	0	0	0	0	0	0	0	0	0	0	0	0	0	0	0	0	0	0
NG-33833_sus2_lib708280_10265_1.mkdup.sorted.filtered	0	0	0	0	10.5263	1.47059	0	0	0	0	5.88235	0	0	0	6.66667	0	0	0	0	0	0	0	0	0	0	0	0	0	0	0	0	0	0	0	0	0	0	0	0	0	0	0	0	0	0	0	0	0	0
NG-33833_sus30_lib708290_10265_1.mkdup.sorted.filtered	0	0	0	0	33.3333	3.125	0	0	0	0	0	15.3846	0	0	0	0	0	0	0	0	0	0	0	0	0	0	0	0	0	0	0	0	0	0	5	0	0	0	0	0	0	0	0	0	0	0	0	0	0
NG-33833_sus33_lib708287_10265_1.mkdup.sorted.filtered	0	0	0	0	0	0	0	0	0	0	0	0	0	0	0	0	0	0	0	0	0	0	0	0	0	0	0	0	0	0	0	0	0	0	0	0	0	0	0	0	0	0	0	0	0	0	0	0	0
NG-33833_sus35_lib708289_10265_1.mkdup.sorted.filtered	0	0	0	0	0	0	0	0	0	0	0	0	0	0	0	0	0	5.88235	0	0	0	0	0	0	0	0	0	0	0	0	0	0	0	0	0	0	0	0	0	0	0	0	3.44828	0	0	0	0	0	0
NG-33833_sus3_lib708281_10265_1.mkdup.sorted.filtered	0	0	0	0	0	0	0	0	3.22581	0	0	0	0	0	5	0	5.55556	0	0	0	0	0	0	0	0	0	10	0	0	0	0	0	0	0	0	0	0	0	0	0	22.2222	0	0	0	0	0	0	0	0
NG-33833_sus40_lib708288_10265_1.mkdup.sorted.filtered	0	0	0	0	0	2.7027	0	0	0	0	0	0	0	0	0	0	0	0	0	0	0	0	0	0	0	0	0	0	0	0	0	0	0	0	0	0	0	0	0	0	0	0	0	0	0	0	0	0	0
NG-33833_sus4_lib708282_10265_1.mkdup.sorted.filtered	0	0	0	0	0	0	3.44828	0	0	0	0	0	0	0	0	0	0	0	0	0	0	0	0	0	0	0	0	0	0	0	0	0	0	0	0	0	0	0	0	0	0	0	0	0	0	0	0	0	0
NG-33833_sus7_lib708283_10265_1.mkdup.sorted.filtered	0	0	0	0	0	1.49254	0	0	0	0	0	6.89655	0	3.33333	0	0	0	0	0	0	0	0	0	0	0	0	0	0	0	0	0	0	0	0	0	0	0	0	0	0	0	0	4.54545	0	0	0	0	0	0
[truncated: 34 more columns]
